# Supplementary material for: Genome-Wide High-Throughput Screening to Investigate Essential Genes Involved in Methicillin-Resistant Staphylococcus aureus Sequence Type 398 Survival
Source: PLoS One. 2014 Feb 12;9(2):e89018. doi: 10.1371/journal.pone.0089018 (PMC3923074; doi:10.1371/journal.pone.0089018)
Supplement: Table S2 — Proposed beneficial genes. (XLSX) [file pone.0089018.s007.xlsx]

## Sheet: Insertion index <0.02
Gene ID	Insertion index	Name	Essential in previous studies	COG	Gene description (protein coding)	Function
ID=SAPIG1210	0.00041511	SAPIG1210	y	L			cut-off 0.007
ID=SAPIG0622	0.000480307	fusA	y	J
ID=SAPIG1226	0.000485201	recG	n	K, L	ATP-dependent DNA helicase RecG	DNA repair
ID=SAPIG1288	0.000641026		y	R
ID=SAPIG0468	0.000648508	SAPIG0468	y	F
ID=SAPIG1571	0.000673401	zwf	y	G
ID=SAPIG1994	0.000685871	SAPIG1994	y	J
ID=SAPIG1993	0.00070028		y	J
ID=SAPIG2145	0.000707714	atpD	n	C	ATP synthase F1, beta subunit	Metabolic pathways
ID=SAPIG1182	0.000710732	ftsA	y	D
ID=SAPIG1739	0.000713776		y	J
ID=SAPIG1727	0.00074239	hemA	n	H	glutamyl-tRNA reductase	Metabolic pathways
ID=SAPIG0547	0.000747384	SAPIG0547	n	E	Orn/Lys/Arg decarboxylase	Amino acid transport and metabolism
ID=SAPIG0945	0.000750751	pgi	y	G
ID=SAPIG2163	0.000759301	rho	n	K	transcription termination factor Rho	Transcription
ID=SAPIG1718	0.000760167	valS	y	J
ID=SAPIG0575	0.000771605		y	D
ID=SAPIG1707	0.000773395		n	R	Spo0B-associated GTP-binding protein	unknown
ID=SAPIG2595	0.00078064	SAPIG2595	y	no related COG
ID=SAPIG1581	0.000784314		n	C	lipoamide acyltransferase component of branched-chain alpha-keto aciddehydrogenase complex (Dihydrolipoyllysine-residue (2-methylpropanoyl)transferase) (E2) (Dihydrolipoamide branched chaintransacylase)	Metabolic pathways
ID=SAPIG2314	0.000789889	SAPIG2314	y	V
ID=SAPIG1694	0.000791766	hisS	y	J
ID=SAPIG1235	0.000799361	SAPIG1235	y	U
ID=SAPIG1811	0.00082713	leuS	y	J
ID=SAPIG1457	0.000831255	SAPIG1457	y	J
ID=SAPIG1764	0.000831255	ackA	n	C	acetate kinase	Metabolic pathways
ID=SAPIG1013	0.00085034		n	M	UDP-glucose diacylglycerol glucosyltransferase	glycerolipid metabolism
ID=SAPIG0267	0.000854701	SAPIG0267	n	M	cdp-glycerol:poly(glycerophosphate) glycerophosphotransFerase (polyglycerol phosphate polymerase) (cgptase) (majorteichoic acid biosynthesis protein f)	Cell envelope biogenesis
ID=SAPIG2596	0.000856898	SAPIG2596	y	I
ID=SAPIG0949	0.000862813	addB	n	L	ATP-dependent nuclease subunit B	Nucleic acid metabolism
ID=SAPIG1662	0.000908265		y	R
ID=SAPIG1419	0.000933707	murG	y	M
ID=SAPIG0823	0.00094697	SAPIG0823	n	M	probable undecaprenyl-phosphate N-acetylglucosaminyl 1-phosphatetransferase (UDP-GlcNAc:undecaprenyl-P GlcNAc 1-Ptransferase)
ID=SAPIG0577	0.00095511	SAPIG0577	n	O	putative Cell division protease FtsH homolog	Cell division
ID=SAPIG0851	0.00098912	gap	y	G
ID=SAPIG1998	0.000998004	ligA	y	L
ID=SAPIG1057	0.00100553	qoxB	n	C	cytochrome aa3 quinol oxidase, subunit I	Metabolic pathways
ID=SAPIG0662	0.00101317	pta	y	C
ID=SAPIG1228	0.00101317	plsX	y	I
ID=SAPIG1752	0.00103199	pfkA	y	G
ID=SAPIG1468	0.00104167		y	H
ID=SAPIG0462	0.00104493	SAPIG0462	n	no related COG	hypothetical protein	Unknown
ID=SAPIG1428	0.00104493	thyA	y	F
ID=SAPIG1753	0.0010582	accA	y	I
ID=SAPIG0840	0.00106838	trxB	y	O
ID=SAPIG0814	0.00108225	murB	y	M
ID=SAPIG1646	0.00109111	dnaK	y	O
ID=SAPIG2209	0.00110742	glmS	y	M
ID=SAPIG1627	0.00111111	SAPIG1627	y	L
ID=SAPIG1632	0.00111111	era	y	R
ID=SAPIG1220	0.00114155	rsgA	y	R
ID=SAPIG2167	0.00116144	fba	y	G
ID=SAPIG0544	0.00117786		y	L
ID=SAPIG2754	0.00119048	SAPIG2754	y	K
ID=SAPIG2159	0.00119904	hemK	y	J
ID=SAPIG2172	0.00124378	coaA	y	H
ID=SAPIG1146	0.00124844	murI	y	M
ID=SAPIG1756	0.00125078	SAPIG1756	y	L
ID=SAPIG1290	0.00125313	SAPIG1290	n	S	hypothetical protein	Unknown
ID=SAPIG2147	0.00132538	atpA	y	C
ID=SAPIG1736	0.00133869	SAPIG1736	y	E
ID=SAPIG1014	0.0013468	SAPIG1014	y	M
ID=SAPIG1240	0.00135501	trmD	y	J
ID=SAPIG0915	0.00137174	dltA	y	E
ID=SAPIG1558	0.00137741	SAPIG1558	n	K, T	transcriptional regulatory protein ResD	Transcription regulator
ID=SAPIG0618	0.00137969	rpoC	y	K
ID=SAPIG1260	0.00138313	pyrH	y	F
ID=SAPIG1234	0.00140174	smc	y	D
ID=SAPIG0808	0.0014245	SAPIG0808	y	F
ID=SAPIG1460	0.00143062	SAPIG1460	y	R
ID=SAPIG1664	0.0014556	mtnN	y	R
ID=SAPIG1592	0.00147493	accC	y	I
ID=SAPIG1311	0.00149142	glnA	y	E
ID=SAPIG1476	0.00151515	cmk	y	F
ID=SAPIG1682	0.0015186	alaS	y	J
ID=SAPIG1985	0.00152207	SAPIG1985	y	M
ID=SAPIG0014	0.00152439	SAPIG0014	y	T
ID=SAPIG1473	0.00152555	engA	y	R
ID=SAPIG2297	0.00152905	rpsC	y	no related COG
ID=SAPIG2283	0.00154679	SAPIG2283	y	no related COG
ID=SAPIG1737	0.00154799	thrS	y	J
ID=SAPIG1221	0.00155039	rpe	y	G
ID=SAPIG1722	0.001554	hemL	n	H	glutamate-1-semialdehyde-2,1-aminomutase	Metabolic pathways
ID=SAPIG0604	0.00155763	cysE	y	E
ID=SAPIG1222	0.00155763	SAPIG1222	y	H
ID=SAPIG1717	0.00157233	SAPIG1717	y	H
ID=SAPIG1647	0.0015949	grpE	y	O
ID=SAPIG0980	0.00160643	fabF	y	I, Q
ID=SAPIG0899	0.00161031	SAPIG0899	y	E
ID=SAPIG1732	0.00164204	SAPIG1732	y	R
ID=SAPIG1056	0.00165017	quxC	n	C	cytochrome aa3 quinol oxidase, subunit III	Metabolic pathways
ID=SAPIG1838	0.00167504	metK	y	H
ID=SAPIG1278	0.00168776	SAPIG1278	n	D	dna translocase ftsk (dna translocase spoiiie)	Cell division
ID=SAPIG0617	0.00168919	rpoB	y	K
ID=SAPIG1728	0.00169205		y	R
ID=SAPIG1645	0.00175439	dnaJ	y	O
ID=SAPIG1685	0.00178731	trmU	y	J
ID=SAPIG1178	0.00178971	SAPIG1178	y	M
ID=SAPIG1123	0.00179211	SAPIG1123	y	R
ID=SAPIG1594	0.00179211	efp	y	J
ID=SAPIG1187	0.0018018	SAPIG1187	y	S
ID=SAPIG1261	0.0018018	frr	y	J
ID=SAPIG1807	0.00180505	SAPIG1807	y	R
ID=SAPIG1626	0.00180668	SAPIG1626	y	K
ID=SAPIG1088	0.00181159	def	y	J
ID=SAPIG1058	0.00181653	SAPIG1058	n	C	quinol oxidase subunit 2 (Quinol oxidasepolypeptide II) (Quinol oxidase aa3-600, subunit QoxA) (Oxidase aa(3)-600 subunit 2)	Metabolic pathways
ID=SAPIG2547	0.0018315	SAPIG2547	n	no related COG	phosphomannomutase	Carbohydrate metabolism
ID=SAPIG1560	0.00184162	scpB	y	K
ID=SAPIG2291	0.00185185		y	no related COG
ID=SAPIG0666	0.00185701	SAPIG0666	y	I
ID=SAPIG2160	0.00185701	prfA	y	J
ID=SAPIG2169	0.0018622	pyrG	y	F
ID=SAPIG2288	0.0018622	SAPIG2288	y	J
ID=SAPIG1271	0.00188857	infB	y	J
ID=SAPIG2398	0.00190476	fni	y	C
ID=SAPIG1276	0.00190749	SAPIG1276	n	J	polyribonucleotide nucleotidyltransferase (Polynucleotidephosphorylase) (PNPase) (Vegetative protein 15) (VEG15)	RNA degradation
ID=SAPIG0950	0.00191571	addA	n	L	recombination helicase AddA	Recombination
ID=SAPIG2149	0.00191571	atpF	n	C	ATP synthase F0, B subunit	Metabolic pathways
ID=SAPIG1361	0.00198177	SAPIG1361	y	S
ID=SAPIG0446	0.00198413		n	L	single-stranded DNA-binding protein (SSB) (Helix-destabilizingprotein)	DNA replication, recombination, repair
ID=SAPIG0614	0.00199601	SAPIG0614	y	J
ID=SAPIG1583	0.0020141		n	C	2-oxoisovalerate dehydrogenase subunit alpha (branched-chain alpha-keto acid dehydrogenase e1 component alpha chain) (bckdhe1-alpha)	Metabolic pathways
ID=SAPIG0583	0.00201613	lysS	y	J
ID=SAPIG1788	0.0020202	ccpA	n	K	catabolite control protein A	Transcription regulator
ID=SAPIG1091	0.00204499		y	C
ID=SAPIG1652	0.00205128	holA	y	L
ID=SAPIG1723	0.00205128	hemB	n	H	delta-aminolevulinic acid dehydratase	Metabolic pathways
ID=SAPIG0809	0.00205761	SAPIG0809	y	F
ID=SAPIG0005	0.00206718	gyrB	y	L
ID=SAPIG0566	0.00207039	prsA	y	E, F
ID=SAPIG1266	0.00208478	polC	n	L	DNA polymerase	DNA replication
ID=SAPIG1136	0.00208986	rnhC	n	L	ribonuclease hiii	DNA replication
ID=SAPIG2277	0.0021164	rpoA	n	no related COG	DNA-directed RNA polymerase, alpha subunit	RNA polymerase
ID=SAPIG0979	0.00212314		y	I
ID=SAPIG2756	0.00212993	gidA	y	D
ID=SAPIG1215	0.00213675	fmt	y	J
ID=SAPIG1593	0.00215054	accB	y	I
ID=SAPIG1630	0.00215517	glyS	y	J
ID=SAPIG1229	0.0021575	fabD	y	I
ID=SAPIG1570	0.00217155	rnz	y	R
ID=SAPIG1180	0.00222222	murD	y	M
ID=SAPIG0015	0.00223714	rplI	y	J
ID=SAPIG1291	0.00227144	SAPIG1291	n	C	pyruvate ferredoxin oxidoreductase alpha chain	Metabolic pathways
ID=SAPIG1116	0.00229885	SAPIG1116	n	S	regulatory protein YlbF	Replication, recombination and repair
ID=SAPIG2296	0.00229885	rplP	y	J
ID=SAPIG1092	0.00232019		n	C	dihydrolipoyllysine-residue acetyltransferase component of pyruvatedehydrogenase complex (E2) (Dihydrolipoamideacetyltransferase component of pyruvate dehydrogenase complex)	carbon metabolism
ID=SAPIG1011	0.00232288	SAPIG1011	n	G, E, P, R	MFS-type transporter	Transport
ID=SAPIG1957	0.00232558	hemL	n	H	glutamate-1-semialdehyde-2,1-aminomutase	Metabolic pathways
ID=SAPIG0009	0.002331	serS	y	J
ID=SAPIG1754	0.002331	accD	y	I
ID=SAPIG2142	0.00236967	murA	y	M
ID=SAPIG1375	0.0023753	SAPIG1375	y	V
ID=SAPIG0663	0.00238949	SAPIG0663	y	H
ID=SAPIG1617	0.00240848	SAPIG1617	n	M	penicillin-binding Protein dimerisation domain family	Peptidoglycan biosynthesis
ID=SAPIG2007	0.00243309	nadE	y	H
ID=SAPIG1110	0.00244499	SAPIG1110	y	D
ID=SAPIG2066	0.00247372	groL	y	O
ID=SAPIG1357	0.00249688	parC	y	L
ID=SAPIG1997	0.0025	SAPIG1997	n	R	sex pheromone staph-cAM373
ID=SAPIG0716	0.00251572	SAPIG0716	y	M, G
ID=SAPIG1802	0.00252525	SAPIG1802	y	M
ID=SAPIG0470	0.00254453	SAPIG0470	n	no related COG	bovine pathogenicity island protein Orf20	Transcription regulator
ID=SAPIG0573	0.00254453	SAPIG0573	y	D
ID=SAPIG1284	0.00254453	SAPIG1284	n	S	hypothetical protein	Unknown
ID=SAPIG0918	0.00255102	SAPIG0918	y	M
ID=SAPIG1268	0.00255102	nusA	y	K
ID=SAPIG1263	0.00255428	cdsA	y	I
ID=SAPIG1262	0.00259403	uppS	y	I
ID=SAPIG0897	0.00262467	sufC	y	O
ID=SAPIG1981	0.00263505	map	y	J
ID=SAPIG0927	0.00266667	SAPIG0927	y	Q
ID=SAPIG0932	0.00267201	SAPIG0932	y	C, P
ID=SAPIG0004	0.00269542	SAPIG0004	n	L	DNA replication and repair protein RecF	DNA repair
ID=SAPIG1310	0.00271003	SAPIG1310	y	K
ID=SAPIG2293	0.00271003	rplN	y	no related COG
ID=SAPIG2008	0.00272109	pncB	y	H
ID=SAPIG0467	0.00272665	guaB	y	F
ID=SAPIG1984	0.00273224		y	R
ID=SAPIG2463	0.00273224		n	no related COG	L-cystine import ATP-binding protein TcyN	transport
ID=SAPIG1999	0.00273598	pcrA	y	L
ID=SAPIG1697	0.00273973	SAPIG1697	y	K, T
ID=SAPIG2151	0.00274348	atpB	n	C	ATP synthase F0, A subunit	Metabolic pathways
ID=SAPIG2112	0.00277778	acpS	y	J, K, L
ID=SAPIG0268	0.0027894		y	I
ID=SAPIG1693	0.00282965	aspS	y	J
ID=SAPIG1134	0.00283286	pheS	y	J
ID=SAPIG1282	0.00283688		n	I, Q, R	3-ketoacyl-	fatty acid biosynthesis
ID=SAPIG0016	0.0028551	dnaB	y	L
ID=SAPIG1897	0.0028551	hemG	n	H	protoporphyrinogen oxidase	Metabolic pathways
ID=SAPIG1899	0.00289017	hemE	n	H	uroporphyrinogen decarboxylase	Metabolic pathways
ID=SAPIG1445	0.00289855		y	D
ID=SAPIG1191	0.00290487	ileS	y	J
ID=SAPIG1453	0.00291121	SAPIG1453	y	L
ID=SAPIG2388	0.00291121	rpiA	y	G
ID=SAPIG1237	0.00292398	ffh	y	U
ID=SAPIG0933	0.00292398	SAPIG0933	y	P
ID=SAPIG1265	0.00293427	proS	y	J
ID=SAPIG1770	0.00294985	ezrA	y	D
ID=SAPIG2216	0.00294985	glmM	y	G
ID=SAPIG0565	0.00295639	glmU	y	M
ID=SAPIG2090	0.00301659	SAPIG2090	y	o
ID=SAPIG2303	0.00301659	rplC	y	no related COG
ID=SAPIG0830	0.00302115	prfB	y	J
ID=SAPIG0992	0.0030303	trpS	y	J
ID=SAPIG1181	0.0030303	SAPIG1181	n	M	cell division protein	Cell division
ID=SAPIG1793	0.00304414	murC	y	M
ID=SAPIG0665	0.00304878	mvaD	y	I
ID=SAPIG0855	0.00306513	eno	y	G
ID=SAPIG1456	0.00308642	SAPIG1456	y	H
ID=SAPIG0796	0.00309119	SAPIG0796	y	M
ID=SAPIG0713	0.00310078	SAPIG0713	n	K	iron dependent repressor	Transcription regulator
ID=SAPIG1709	0.00311526		y	J
ID=SAPIG1376	0.0031746	SAPIG1376	y	V
ID=SAPIG1141	0.0031746	trx	y	O, C
ID=SAPIG2302	0.00320513	rplD	y	J
ID=SAPIG1207	0.00320513	gmk	y	F
ID=SAPIG2304	0.00323625	rpsJ	n	J	ribosomal protein S10
ID=SAPIG0550	0.00323625		y	L
ID=SAPIG0600	0.003256	SAPIG0600	n	O	egative regulator of genetic competence ClpC/mecB	Posttranslational modification
ID=SAPIG0854	0.00329381	gpmI	y	G
ID=SAPIG0564	0.00330033	SAPIG0564	n	M	SpoVG superfamily	Regulatory protein
ID=SAPIG0852	0.00335852	pgk	y	G
ID=SAPIG1563	0.00337838	xerD	n	L	tyrosine recombinase XerD	DNA replication, recombination, and repair
ID=SAPIG1243	0.00338983	SAPIG1243	y	R
ID=SAPIG0846	0.00340136	clpP	y	U, O
ID=SAPIG0930	0.00340136		y	P
ID=SAPIG2133	0.00343643	SAPIG2133	y	U
ID=SAPIG1292	0.00346021	SAPIG1292	n	C	ferrodoxin oxidoreductase beta subunit	TCA cycle
ID=SAPIG1086	0.00353357	SAPIG1086	y	R
ID=SAPIG0829	0.0035545	secA	y	U
ID=SAPIG1735	0.00356506	infC	y	J
ID=SAPIG0688	0.00361011	argS	y	J
ID=SAPIG1816	0.00362319	SAPIG1816	n	I	hydrolase, alpha/beta fold family, putative	Lipid metabolism
ID=SAPIG2301	0.00362319	rplW	y	no related COG
ID=SAPIG0611	0.00364299	nusG	n	K	transcription termination/antitermination factor NusG	Transcription regulator
ID=SAPIG0001	0.00367107	dnaA	y	L
ID=SAPIG1960	0.00368324		n	J	protein LMOf2365_1711	unknown
ID=SAPIG0717	0.00369004	SAPIG0717	y	M, G
ID=SAPIG0576	0.0037037	hpt	y	F
ID=SAPIG2148	0.0037037	atpH	n	C	ATP synthase F1, delta subunit	m
ID=SAPIG2170	0.00376648	rpoE	n	K	DNA-directed RNA polymerase, delta subunit	RNA polymerase
ID=SAPIG1663	0.00378788	yqeG	y	R
ID=SAPIG2158	0.00382044	SAPIG2158	y	S
ID=SAPIG0898	0.00382263	sufD	y	O
ID=SAPIG1287	0.00383142	recA	n	L	protein RecA	DNA repair
ID=SAPIG1730	0.00384025	tig	n	O	trigger factor
ID=SAPIG1763	0.00385356	SAPIG1763	n	T	universal stress protein family	Cellular stress
ID=SAPIG1252	0.00385356	topA	y	L
ID=SAPIG1239	0.00396825	rimM	y	J
ID=SAPIG1344	0.00402212	tkt	y	G
ID=SAPIG1363	0.00406504	SAPIG1363	y	K
ID=SAPIG1230	0.00408163	fabG	y	I, Q, R
ID=SAPIG1552	0.00409836	SAPIG1552	n	no related COG	phage repressor	Transcription regulator, DNA reapir
ID=SAPIG1345	0.00411523		n	S	hypothetical protien	unknown
ID=SAPIG2125	0.00415628	SAPIG2125	y	D
ID=SAPIG2464	0.00416667	SAPIG2464	n	E, H	L-cystine transport system permease protein TcyB	Transport
ID=SAPIG2546	0.0041876	SAPIG2546	n	no related COG	modification methylase EcoRII (Cytosine-specificmethyltransferase EcoRII) (M.EcoRII)	Transcription regulator
ID=SAPIG1584	0.00421941	lpdA	y	C
ID=SAPIG0844	0.0042328	SAPIG0844	n	S	hypothetical protein	Unknown
ID=SAPIG1757	0.00424628	SAPIG1757	n	R	DHH family protein
ID=SAPIG1908	0.00424628	SAPIG1908	n	R	3'-5' exoribonuclease YhaM
ID=SAPIG1267	0.0042735	SAPIG1267	n	S	protein LMOf2365_1338	Unknown
ID=SAPIG1232	0.0042735	acpP	y	I, Q
ID=SAPIG1898	0.004329	hemH	n	H	ferrochelatase	Metabolic pathways
ID=SAPIG1588	0.004329	xseB	y	L
ID=SAPIG1112	0.00438596	SAPIG1112	n	O	cytochrome aa3-controlling protein	Posttranslational modification
ID=SAPIG2123	0.00442478	SAPIG2123	y	M
ID=SAPIG1625	0.00442478	SAPIG1625	y	R
ID=SAPIG2153	0.00443262	SAPIG2153	y	M
ID=SAPIG0559	0.00447427	ksgA	n	J	dimethyladenosine transferase
ID=SAPIG1090	0.00449236	pdhA	y	no related COG
ID=SAPIG1087	0.00456621	SAPIG1087	y	S
ID=SAPIG2281	0.00456621	infA	y	no related COG
ID=SAPIG0567	0.00458716	SAPIG0567	n	J	ribosomal protein L25, Ctc-form
ID=SAPIG2572	0.0045977	SAPIG2572	n	K	transcriptional regulator MarR family	Antibiotic resistance
ID=SAPIG0822	0.00466853	SAPIG0822	y	T
ID=SAPIG2084	0.00471698	SAPIG2084	n	R	redox-sensing transcriptional repressor rex	Transcription regulator
ID=SAPIG1712	0.00474496	mreC	y	M
ID=SAPIG1352	0.00480414	acnA	n	C	aconitate hydratase 1	TCA cycle
ID=SAPIG1742	0.00480769	coaE	y	H
ID=SAPIG1480	0.004811	SAPIG1480	y	no related COG
ID=SAPIG0620	0.00483092	rpsL	y	J
ID=SAPIG0548	0.00485437	tmk	y	F
ID=SAPIG0916	0.00493827	SAPIG0916	y	M
ID=SAPIG1002	0.00493827	SAPIG1002	y	G
ID=SAPIG1705	0.00497512	ruvA	y	L
ID=SAPIG2750	0.00497512	SAPIG2750	n	K	hypothetical protein	Unknown
ID=SAPIG1135	0.00499376	pheT	y	J
ID=SAPIG0546	0.00502513	recR	n	L	recombination protein RecR	DNA repair
ID=SAPIG0161	0.00510204	SAPIG0161	n	E	putative DNA-binding protein	Transcription regulator
ID=SAPIG2465	0.00512821	SAPIG2465	n	no related COG	L-cystine-binding protein TcyA	Tranport
ID=SAPIG1245	0.00514139	SAPIG1245	y	C
ID=SAPIG1257	0.00516796	codY	n	K	GTP-sensing transcriptional pleiotropic repressor CodY	Transcriptional repressor
ID=SAPIG1907	0.00519211	SAPIG1907	y	O
ID=SAPIG1258	0.00520833	rpsB	y	J
ID=SAPIG2122	0.0052597	SAPIG2122	n	J, K, L	cold-shock deAd box protein a (atp-dependent rna helicasedead)	DNA replication, recombination, and repair
ID=SAPIG0002	0.00529101	dnaN	y	L
ID=SAPIG2276	0.00542005	rpæQ	y	J
ID=SAPIG1194	0.00544662	rluD	n	J	ribosomal large subunit pseudouridine synthase D	Translation (found in stress proteins)
ID=SAPIG0021	0.00547345	SAPIG0021	y	T
ID=SAPIG1113	0.00548246	cyoE	n	O	protoheme IX farnesyltransferase	Metabolic pathways
ID=SAPIG1781	0.00554236	tyrS	y	J
ID=SAPIG0629	0.00557103	ilvE	n	E, H	branched-chain amino acid aminotransferase	Amino acid biosynthesis
ID=SAPIG0556	0.00557244	metG	y	J
ID=SAPIG1733	0.00560224	rplT	y	J
ID=SAPIG1711	0.00564972	mreD	n	M	rod shape-determining protein MreD	Cell envelope biogenesis
ID=SAPIG1259	0.00566893	tsf	y	J
ID=SAPIG1695	0.00570776	lytH	y	M
ID=SAPIG0605	0.00571021	cysS	y	J
ID=SAPIG0718	0.00571429	SAPIG0718	y	no related COG
ID=SAPIG0901	0.00572246	sufB	y	O
ID=SAPIG2146	0.00576701	atpG	n	C	ATP synthase F1, gamma subunit	Metabolic pathways
ID=SAPIG2016	0.0058309	SAPIG2016	n	G	YkgB	Metabolic pathways
ID=SAPIG2108	0.00598802	SAPIG2108	n	K, T	phosphoserine phosphatase RsbU (Sigma factor sigBregulation protein rsbU)	Signal transduction mechanisms
ID=SAPIG0006	0.00599251	gyrA	y	L
ID=SAPIG2078	0.00606061	SAPIG2078	n	G	sucrose-6-phosphate hydrolase (Sucrase) (Invertase)	Carbohydrate metabolism
ID=SAPIG0865	0.00606061		n	no related COG	hypothetical protien	unknown
ID=SAPIG1043	0.00608273	menB	y	H
ID=SAPIG1214	0.00613497	def	y	J
ID=SAPIG0603	0.00618557	gltX	y	J
ID=SAPIG0931	0.00625	SAPIG0931	n	P	Na(+)/H(+) antiporter subunit E (Multiple resistance and pHhomeostasis protein E) (Mrp complex subunit E)	Na/H transport
ID=SAPIG1991	0.00632911	SAPIG1991	y	I, R
ID=SAPIG0621	0.00636943	rpsG	y	J
ID=SAPIG1093	0.00639659	lpdA	n	C	dihydrolipoyl dehydrogenase	Metabolic pathways
ID=SAPIG0836	0.00643087	hprK	y	T
ID=SAPIG1913	0.00645161	SAPIG1913	y	K
ID=SAPIG2014	0.00645161	SAPIG2014	y	C
ID=SAPIG1309	0.00645682	SAPIG1309	n	P	aluminium resistance protein	Inorganic ion transport and metabolism
ID=SAPIG1744	0.00646142	SAPIG1744	n	L	DNA polymerase I (POL I)	DNA repair, recombination and replication
ID=SAPIG1779	0.00647249	SAPIG1779	y	I
ID=SAPIG2105	0.00648508	sigB	n	K	RNA polymerase sigma-B factor	Alternative sigma factor (stress response)
ID=SAPIG1006	0.00648508	SAPIG1006	y	I
ID=SAPIG0597	0.00649351	SAPIG0597	n	K	transcriptional regulator CtsR	Transcriptional repressor, stress genes
ID=SAPIG2124	0.00653595	SAPIG2124	y	M
ID=SAPIG0914	0.00653595	SAPIG0914	y	no related COG
ID=SAPIG0661	0.00664011	SAPIG0661	n	S	chlorite dismutase
ID=SAPIG0434	0.00676819	SAPIG0434	y	I
ID=SAPIG1596	0.00687285	SAPIG1596	y	no related COG
ID=SAPIG1660	0.00687285	SAPIG1660	y	J
ID=SAPIG1397	0.00691563	dapB	y	E
ID=SAPIG2549	0.00692042	galU	n	no related COG	UTP-glucose-1-phosphate uridylyltransferase	Cell envelope biogenesis
ID=SAPIG0343	0.00694444		n	no related COG	hypothetical protien	unknown
ID=SAPIG1548	0.00694444		n	no related COG	hypothetical protien	unknown
ID=SAPIG2488	0.00701754	SAPIG2488	n	S	hypothetical protein	Unknown	Cut-off 0.02
ID=SAPIG1700	0.00701754	SAPIG1700	y	U
ID=SAPIG2046	0.00701754		n	no related COG	hypothetical protien	unknown
ID=SAPIG2144	0.00740741	atpC	n	C	ATP synthase F1, epsilon subunit	Metabolic pathways
ID=SAPIG1724	0.00747384	hemD	n	H	uroporphyrinogen-III synthase	Metabolic pathways
ID=SAPIG0993	0.00757576	SAPIG0993	y	P
ID=SAPIG1496	0.00757576		n	no related COG	hypothetical protien	unknown
ID=SAPIG1545	0.00757576		n	no related COG	phi PVL ORF 37 analogue	unknown
ID=SAPIG1590	0.00769231	nusB	n	K	transcription antitermination factor NusB	Transcription
ID=SAPIG1246	0.00770077	sucD	n	C	succinate-CoA ligase, alpha subunit subfamily	Metabolic pathways
ID=SAPIG0269	0.00779727	SAPIG0269	y	E, R
ID=SAPIG0715	0.00784314	SAPIG0715	y	M
ID=SAPIG0526	0.00787402	SAPIG0526	n	E	cystathionine gamma-lyase (Gamma-cystathionase)(Probasin-related antigen) (PRB-RA)
ID=SAPIG0850	0.00788955	SAPIG0850	n	K	glycolytic operon regulator	Transcription
ID=SAPIG0935	0.00789692	SAPIG0935	y	C, P
ID=SAPIG1185	0.00793651	SAPIG1185	n	no related COG	hypothetical protein	Unknown
ID=SAPIG0843	0.00803213	SAPIG0843	n	S	protein YvcK
ID=SAPIG1233	0.00819672	rnc	y	K
ID=SAPIG0872	0.00833333	SAPIG0872	n	no related COG	hypothetical protein	Unknown
ID=SAPIG1054	0.00837521	SAPIG1054	n	V	beta-lactamase	Defense mechanisms
ID=SAPIG0929	0.00840336	SAPIG0929	n	P	MrpG	Transport
ID=SAPIG0948	0.00868056	lepB	y	U
ID=SAPIG1911	0.00869565	SAPIG1911	n	S	protein BLi01058/
ID=SAPIG1623	0.00890869	SAPIG1623	n	J, K, L	ATP-dependent RNA helicase	DNA and RNA unwinding
ID=SAPIG1572	0.00922722	SAPIG1572	n	K	transcriptional regulator, AraC family
ID=SAPIG1247	0.00938967	SAPIG1247	n	no related COG	LytN protein
ID=SAPIG1765	0.00949367	SAPIG1765	n	L	hypothetical protein	Unknown
ID=SAPIG1341	0.00961538	lexA	y	K, T
ID=SAPIG2254	0.00968992	lacB	n	G	galactose-6-phosphate isomerase, LacB subunit	Metabolic pathways
ID=SAPIG1679	0.00970874	SAPIG1679	n	S	hypothetical protein	Defense mechanisms
ID=SAPIG1273	0.00980392	truB	n	J	tRNA pseudouridine synthase B
ID=SAPIG0429	0.00980392	SAPIG0429	n	K	hypothetical protein	Recombination regulator
ID=SAPIG1734	0.00995025	rpmI	y	J
ID=SAPIG2272	0.00995025	truA	n	J	tRNA pseudouridine synthase A
ID=SAPIG1199	0.00999092	carA	n	E, F	carbamoyl-phosphate synthase, small subunit
ID=SAPIG1370	0.01001	trpD	n	E	anthranilate phosphoribosyltransferase	Metabolic pathways
ID=SAPIG2002	0.0100309	purB	n	F	adenylosuccinate lyase	Nucleotide transport and metabolism
ID=SAPIG0731	0.0100402	SAPIG0731	n	no related COG	hypothetical protein	Unknown
ID=SAPIG1198	0.0101721	SAPIG1198	n	F	dihydroorotase (DHOase)	Nucleotide metabolism
ID=SAPIG1466	0.0102828	aroC	n	E	chorismate synthase	Metabolic pathways
ID=SAPIG1534	0.0104167		n	no related COG	hypothetical protien	unknown
ID=SAPIG0887	0.0104987	gcvH	n	E	glycine cleavage system H protein
ID=SAPIG0458	0.0105263	ahpC	n	O	peroxiredoxin
ID=SAPIG0270	0.0106572	SAPIG0270	y	M
ID=SAPIG1114	0.0108225	SAPIG1114	n	S	hypothetical protein	Cell envelope biogenesis
ID=SAPIG1281	0.010878	SAPIG1281	n	R	peptidase, M16 family	Transcriptional regulator
ID=SAPIG1966	0.010989	SAPIG1966	n	R	regulatory protein RecX	Unknown
ID=SAPIG2275	0.0111111	SAPIG2275	n	no related COG	cobalt import ATP-binding protein CbiO 2	Transport
ID=SAPIG1550	0.0112613	SAPIG1550	n	no related COG	77ORF023	Cell envelope biogenesis
ID=SAPIG1587	0.0113379	SAPIG1587	y	H
ID=SAPIG2141	0.0113379	fabZ	y	I
ID=SAPIG2598	0.0113798	SAPIG2598	n	O	ATP-dependent Clp protease ATP-binding subunit ClpL	Metabolic pathways
ID=SAPIG0341	0.011583	SAPIG0341	n	no related COG	phage regulatory protein, Rha family	purine metabolism
ID=SAPIG1390	0.0116487	SAPIG1390	n	P	phosphate-binding protein PstS (PBP)	Unknown
ID=SAPIG1796	0.011655	SAPIG1796	n	S	protein BCE33L4443	Phage associated
ID=SAPIG1176	0.0117521	mraW	n	M	S-adenosyl-methyltransferase MraW	Unknown
ID=SAPIG1748	0.0118203	icd	n	C	isocitrate dehydrogenase, NADP-dependent	Unknown
ID=SAPIG1186	0.0118343	SAPIG1186	y	R
ID=SAPIG0153	0.0118745	deoB	n	G	phosphopentomutase	pirimidine metabolism
ID=SAPIG1651	0.0119048	rpsT	y	J
ID=SAPIG1658	0.0119658	SAPIG1658	n	H	hypothetical protein
ID=SAPIG1631	0.0120482	recO	n	L	DNA repair protein RecO	Adhesion
ID=SAPIG1561	0.0122951	SAPIG1561	n	S	ScpA/B protein	Metabolic pathways
ID=SAPIG0919	0.0123457	SAPIG0919	n	O	nitrogen fixation protein NifU	Cell division
ID=SAPIG1544	0.0123457		n	no related COG	hypothetical protien	unknown
ID=SAPIG1469	0.0123967	SAPIG1469	y	H
ID=SAPIG0749	0.0124031	SAPIG0749	n	S	hypothetical protein
ID=SAPIG1394	0.0124378	SAPIG1394	n	E	aspartokinase 2 (Aspartokinase II) (Aspartate kinase 2)	Unknown
ID=SAPIG1197	0.0124717	pyrB	n	F	aspartate carbamoyltransferase	Metabolic pathways
ID=SAPIG0720	0.0125313	tagD	y	M
ID=SAPIG1674	0.0125786	SAPIG1674	y	K
ID=SAPIG2619	0.0128205	SAPIG2619	n	no related COG	immunodominant staphylococcal antigen A
ID=SAPIG0742	0.0128968	SAPIG0742	n	P	low-affinity inorganic phosphate transporter	Transport
ID=SAPIG0900	0.0129032	SAPIG0900	y	C
ID=SAPIG0926	0.0129081	SAPIG0926	n	R	Na+/H+ antiporter family protein	Unknown
ID=SAPIG0967	0.0129199	SAPIG0967	n	no related COG	conjugative transposon protein
ID=SAPIG1201	0.012931	pyrF	n	F	orotidine 5'-phosphate decarboxylase	Unknown
ID=SAPIG0741	0.012945	SAPIG0741	n	P	protein YkaA	Inorganic ion transport and metabolism
ID=SAPIG2552	0.0131579	SAPIG2552	n	no related COG	hypothetical protein	Unknown
ID=SAPIG1939	0.0131579	SAPIG1939	n	no related COG	tRNA	Unknown
ID=SAPIG2223	0.0131579	SAPIG2223	n	no related COG	tRNA
ID=SAPIG1950	0.0131579		n	P	tRNA
ID=SAPIG1951	0.0131579		n	no related COG	tRNA
ID=SAPIG1618	0.0133333	SAPIG1618	n	P	superoxide dismutase [Mn] (General stress protein 24)(GSP24)	Unknown
ID=SAPIG2101	0.0135135	SAPIG2101	n	no related COG	tRNA	Vitamin B6 metabolism
ID=SAPIG1844	0.0135227	menE	y	I, Q
ID=SAPIG1200	0.0135476	carB	n	E, F	carbamoyl-phosphate synthase, large subunit	Recombination
ID=SAPIG0669	0.0136054	SAPIG0669	n	K	probable DNA-binding protein	Transport
ID=SAPIG1893	0.0136986	SAPIG1893	n	no related COG	tRNA	Unknown
ID=SAPIG2755	0.0138889	gidB	n	no related COG	methyltransferase GidB	TCA cycle
ID=SAPIG1380	0.0142119	SAPIG1380	n	E, P	oligopeptide transport ATPase	Unknown
ID=SAPIG1062	0.0144928	purE	n	F	phosphoribosylaminoimidazole carboxylase, catalytic subunit	Metabolic pathways
ID=SAPIG2126	0.0144928	SAPIG2126	n	no related COG	hypothetical protein	Unknown
ID=SAPIG0594	0.0146396	SAPIG0594	n	H	pyridoxine biosynthesis protein
ID=SAPIG0922	0.0147059	SAPIG0922	n	S	hypothetical protein
ID=SAPIG1970	0.0147569	SAPIG1970	n	R	conserved protein YfkA	Unknown
ID=SAPIG1053	0.0147783	SAPIG1053	n	K	cell envelope-related transcriptional attenuator domain family
ID=SAPIG2072	0.0148148	SAPIG2072	y	no related COG
ID=SAPIG1559	0.0149051	rluB	y	J
ID=SAPIG2274	0.0150987	SAPIG2274	n	P	cobalt import ATP-binding protein CbiO 1	Metabolic pathways
ID=SAPIG0572	0.0151515	SAPIG0572	n	J	heat shock protein 15	Transport
ID=SAPIG1621	0.0152672	SAPIG1621	n	P	ABC transporter, ATP-binding protein	RNA or DNA unwinding
ID=SAPIG2107	0.0152905	SAPIG2107	n	T	anti-sigma-B factor antagonist (Anti-anti-sigma-B factor)	regulators of anti-sigma factors
ID=SAPIG0747	0.0153417	SAPIG0747	n	S	hypothetical protein
ID=SAPIG1499	0.0153846		n	no related COG	hypothetical protien	unknown
ID=SAPIG2446	0.0154525	SAPIG2446	n	no related COG	NreA
ID=SAPIG0738	0.015625	SAPIG0738	n	no related COG	sensor protein BceS
ID=SAPIG0563	0.015748	SAPIG0563	n	J	endoribonuclease L-PSP, putative	DNA-binding repressors and activators
ID=SAPIG0281	0.015873	SAPIG0281	n	no related COG	hypothetical protein	Protease
ID=SAPIG0598	0.015873	SAPIG0598	n	S	UvrB/UvrC motif domain protein	Transport
ID=SAPIG1364	0.015873	SAPIG1364	y	R
ID=SAPIG1842	0.0159681	menC	y	no related COG
ID=SAPIG0595	0.0160428	SAPIG0595	n	H	glutamine amidotransferase subunit PdxT (Glutamineamidotransferase glutaminase subunit pdxT)
ID=SAPIG1211	0.016129	SAPIG1211	n	no related COG	lipoprotein, putative	Unknown
ID=SAPIG0103	0.0162107	SAPIG0103	n	J	tRNA-dihydrouridine synthase	Cell division
ID=SAPIG1351	0.0162602	SAPIG1351	n	no related COG	hypothetical protein	Unknown
ID=SAPIG1497	0.0163399		n	no related COG	hypothetical phage-related protein	unknown
ID=SAPIG1296	0.0163934	SAPIG1296	n	S	hypothetical protein	Surface antigen
ID=SAPIG0562	0.0164141	purR	n	F	pur operon repressor
ID=SAPIG0859	0.0164349	rnr	y	K
ID=SAPIG1343	0.0166667	SAPIG1343	n	S	protein Stu0508	Pentose-phosphate pathway
ID=SAPIG0558	0.0167598	SAPIG0558	n	L	putative primase homolog	Unknown
ID=SAPIG0582	0.0167715	folK	y	H
ID=SAPIG1784	0.0167866	fhs	n	F	formate--tetrahydrofolate ligase	Signal transduction
ID=SAPIG0633	0.0169851	SAPIG0633	n	J, F	tRNA-specific adenosine deaminase	Unknown
ID=SAPIG1868	0.0170683	SAPIG1868	n	no related COG	hypothetical protein	Vitamin B6 metabolism
ID=SAPIG1151	0.017284	SAPIG1151	n	no related COG	fprl1 inhibitory protein (flipr)	Unknown
ID=SAPIG0551	0.0174129	SAPIG0551	n	S	stage 0 sporulation protein YaaT	Transcriptional regulator
ID=SAPIG1177	0.0174129	SAPIG1177	y	D
ID=SAPIG2154	0.0174603	upp	n	F	uracil phosphoribosyltransferase
ID=SAPIG1715	0.0174672	SAPIG1715	n	L	DNA repair protein RadC
ID=SAPIG2110	0.0175439	SAPIG2110	n	no related COG	hypothetical protein	stress
ID=SAPIG1017	0.0175439	SAPIG1017	y	P
ID=SAPIG1369	0.0175439	SAPIG1369	n	E, H	anthranilate synthase glutamine amidotransferase
ID=SAPIG0867	0.0176678	SAPIG0867	n	no related COG	lpxtg-motif cell wall anchor domain	Transport
ID=SAPIG2206	0.0177778	SAPIG2206	n	no related COG	hypothetical protein	cell wall
ID=SAPIG1149	0.0178571	SAPIG1149	n	no related COG	hypothetical protein
ID=SAPIG2165	0.0178571	SAPIG2165	n	K	putative transcriptional regulator superfamily	Unknown
ID=SAPIG1975	0.0181159	SAPIG1975	n	no related COG	hypothetical protein	Metabolic pathways
ID=SAPIG2640	0.0181159	SAPIG2640	n	no related COG	hypothetical protein
ID=SAPIG1125	0.0182292	SAPIG1125	n	no related COG	iron-regulated heme-iron binding protein	Unknown
ID=SAPIG2055	0.0183727	SAPIG2055	n	K	GntR family regulatory protein	Unknown
ID=SAPIG0974	0.0183908	clpB	n	O	ATP-dependent chaperone ClpB	DNA replication, recombination, and repair
ID=SAPIG1320	0.0184397	SAPIG1320	n	no related COG	hypothetical protein	Unknown
ID=SAPIG1046	0.0184645	SAPIG1046	n	E	glutamyl endopeptidase (Staphylococcal serineproteinase) (V8 protease) (V8 proteinase) (Endoproteinase Glu-C)	Unknown
ID=SAPIG1488	0.0185185	SAPIG1488	n	no related COG	hypothetical protein
ID=SAPIG1650	0.0186404	lepA	n	M	GTP-binding protein LepA
ID=SAPIG2255	0.018648	lacA	n	G	galactose-6-phosphate isomerase, LacA subunit
ID=SAPIG1302	0.0187041	glpK	n	C	glycerol kinase
ID=SAPIG0786	0.0188034	SAPIG0786	n	no related COG	hypothetical protein
ID=SAPIG1925	0.0188324	SAPIG1925	n	R	regulatory protein	Regulation
ID=SAPIG1507	0.0188679		n	no related COG	hypothetical protien	unknown
ID=SAPIG1786	0.0189573	SAPIG1786	n	no related COG	acetoin utilization protein AcuA	Unknown
ID=SAPIG0965	0.0190713	SAPIG0965	n	no related COG	transcriptional regulator, Cro/CI family
ID=SAPIG1019	0.0191317	SAPIG1019	n	P	Na+ transporting ATP synthase
ID=SAPIG1396	0.0191441	dapA	y	M, E
ID=SAPIG1556	0.0193548	SAPIG1556	n	no related COG	lipoprotein, putative	Unknown
ID=SAPIG0635	0.0194004	SAPIG0635	n	R	fmn-dependent NADPH-azoreductase
ID=SAPIG1190	0.0194175	SAPIG1190	n	D	cell-divisio initiation protein	Unknown
ID=SAPIG1589	0.019432	xseA	n	L	exodeoxyribonuclease VII, large subunit
ID=SAPIG1654	0.0194805	SAPIG1654	n	F	ComE operon protein 2	Translation, ribosomal structure
ID=SAPIG1142	0.0196409	uvrC	n	L	excinuclease ABC, C subunit	Unknown
ID=SAPIG0616	0.0197044	SAPIG0616	n	J	methyltransferase small domain superfamily	pyrimidine metabolism
ID=SAPIG0236	0.0198413	pflA	n	O	pyruvate formate-lyase 1-activating enzyme	transcriptional regulators
ID=SAPIG1404	0.0199005	SAPIG1404	n	K	cold shock protein, CSD family
ID=SAPIG2765	0.00205198	rRNA				508 protein encoding genes
ID=SAPIG2773	0.00869565	rRNA
ID=SAPIG2766	0.00200133	rRNA
ID=SAPIG2768	0.00136799	rRNA
ID=SAPIG2771	0.00128041	rRNA
ID=SAPIG2770	0.00102599	rRNA
ID=SAPIG2776	0.00869565	rRNA
ID=SAPIG2763	0.00102599	rRNA
ID=SAPIG2761	0.00320102	rRNA
ID=SAPIG2760	0.00136752	rRNA
ID=SAPIG2769	0.00506329	rRNA
ID=SAPIG2777	0.00869565	rRNA
ID=SAPIG2764	0.000683995	rRNA
ID=SAPIG2767	0.00320102	rRNA
ID=SAPIG2757	0.000724638	tRNA
ID=SAPIG0585	0.0131579	tRNA
ID=SAPIG1022	0.0133333	tRNA
ID=SAPIG1930	0.0138889	tRNA
